# Supplementary material for: PDI regulates seizure activity via NMDA receptor redox in rats
Source: PubMed Central journal article supplement (PMC5309844; doi:10.1038/srep42491), 2017-02-15
Supplement: srep42491-s1.pdf [file srep42491-s1.pdf]

## Supplementary information

### **PDI regulates seizure activity via NMDA receptor redox in rats**

**Ji Yang Kim<sup>\*</sup>, Ah-Rhem Ko<sup>\*</sup>, Hye-Won Hyun, Su-Ji Min, Ji-Eun Kim<sup>\*\*</sup>**

*Department of Anatomy and Neurobiology, Institute of Epilepsy Research, College of Medicine, Hallym University, Chuncheon 24252, South Korea.*

**\*\* Address correspondence to:** Dr. Ji-Eun Kim, Department of Anatomy and Neurobiology, Institute of Epilepsy Research, College of Medicine, Hallym University, Chuncheon, Kangwon-Do, 24252, South Korea; [jjieunkim@hallym.ac.kr](mailto:jjieunkim@hallym.ac.kr)

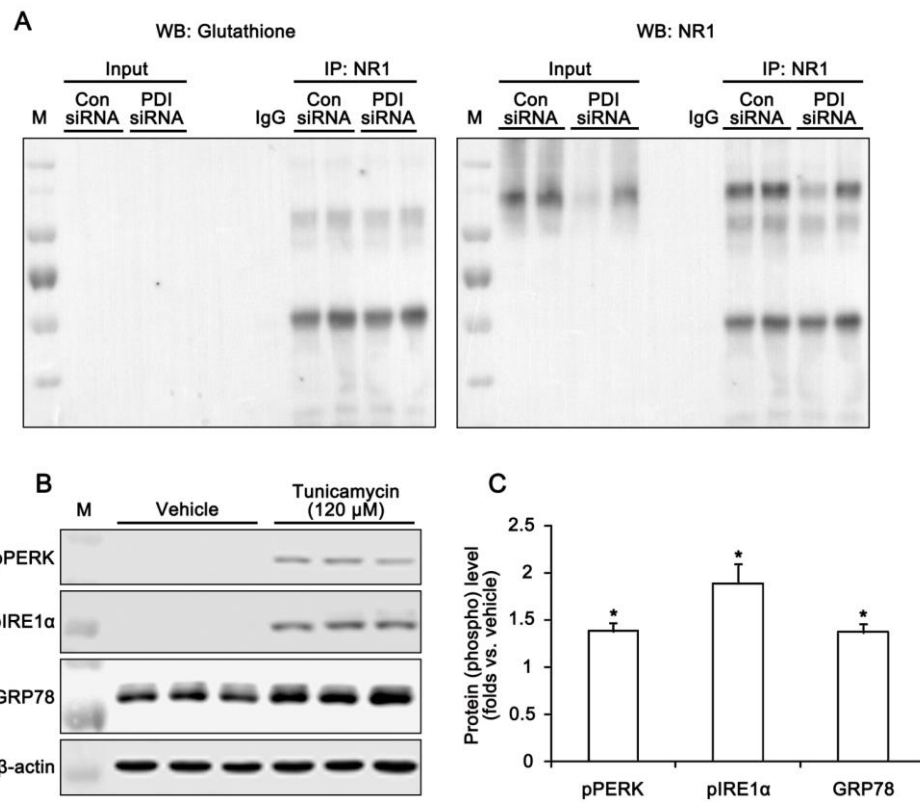

**Supplementary Figure 1.** (A) Effect of PDI knockdown on glutathionylation-mediated NMDAR redox signals. There is the glutathionylation on NR1 subunit in control siRNA- and PDI siRNA-infused animals. (B) Effect of tunicamycin on ER stress. Tunicamycin increases pPERK, pIRE1 $\alpha$  and GRP78 expression in the rat hippocampus, as compared to vehicle (mean  $\pm$  S.E.M.; \* $p$  < 0.05 vs. normal;  $n$  = 5, respectively).

**Fig. 1B**

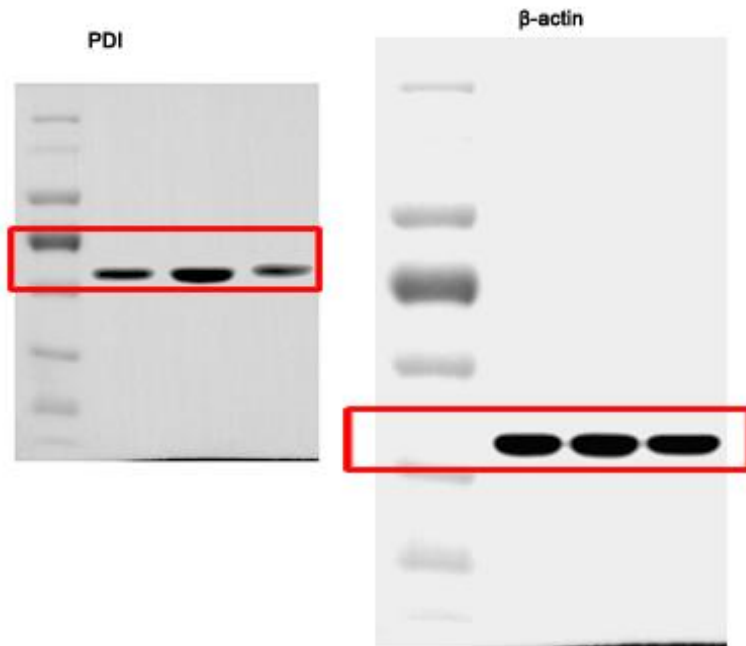

**Supplementary Figure 2.** Full-length gel images of western blot data in Figure 1. The cropped parts of western blots are indicated with boxes.

Fig. 2A.

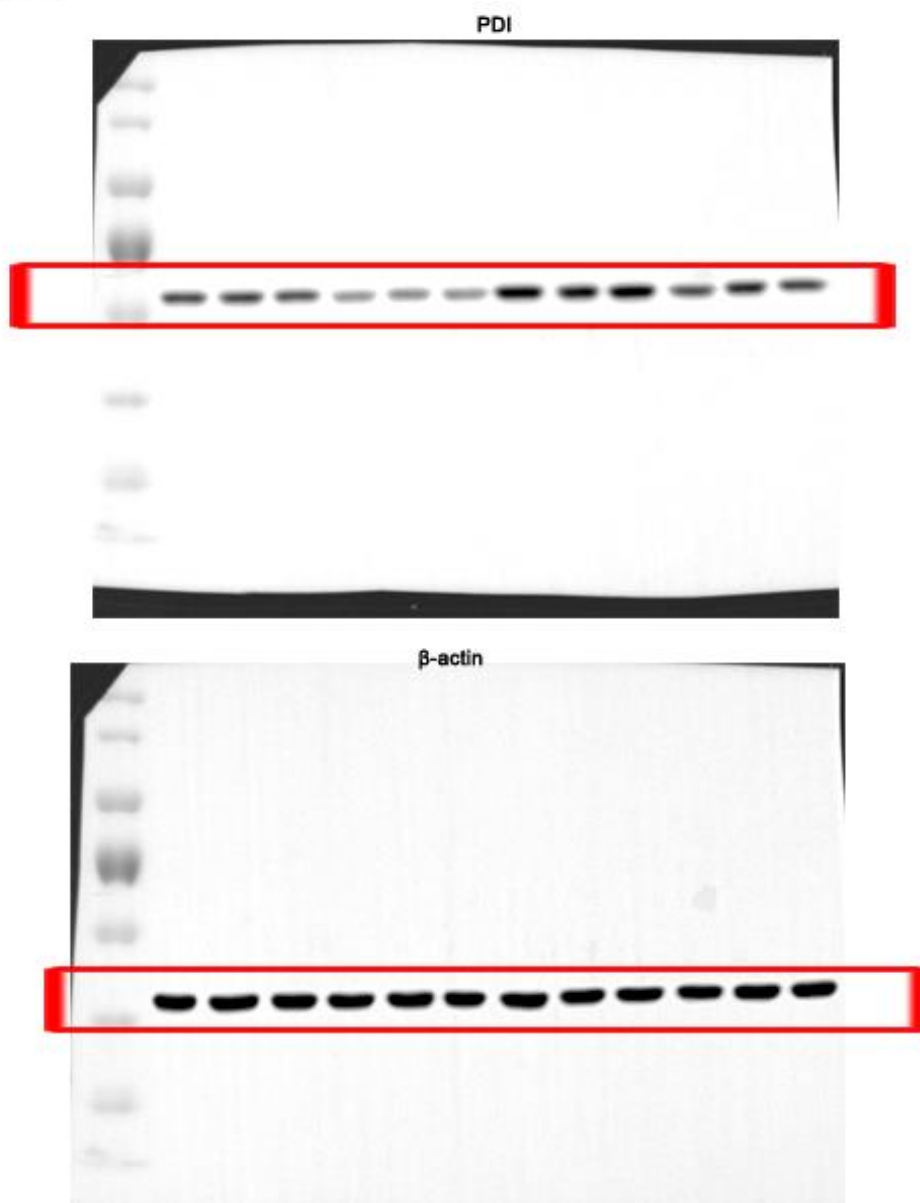

**Supplementary Figure 3.** Full-length gel images of western blot data in Figure 2. The cropped parts of western blots are indicated with boxes.

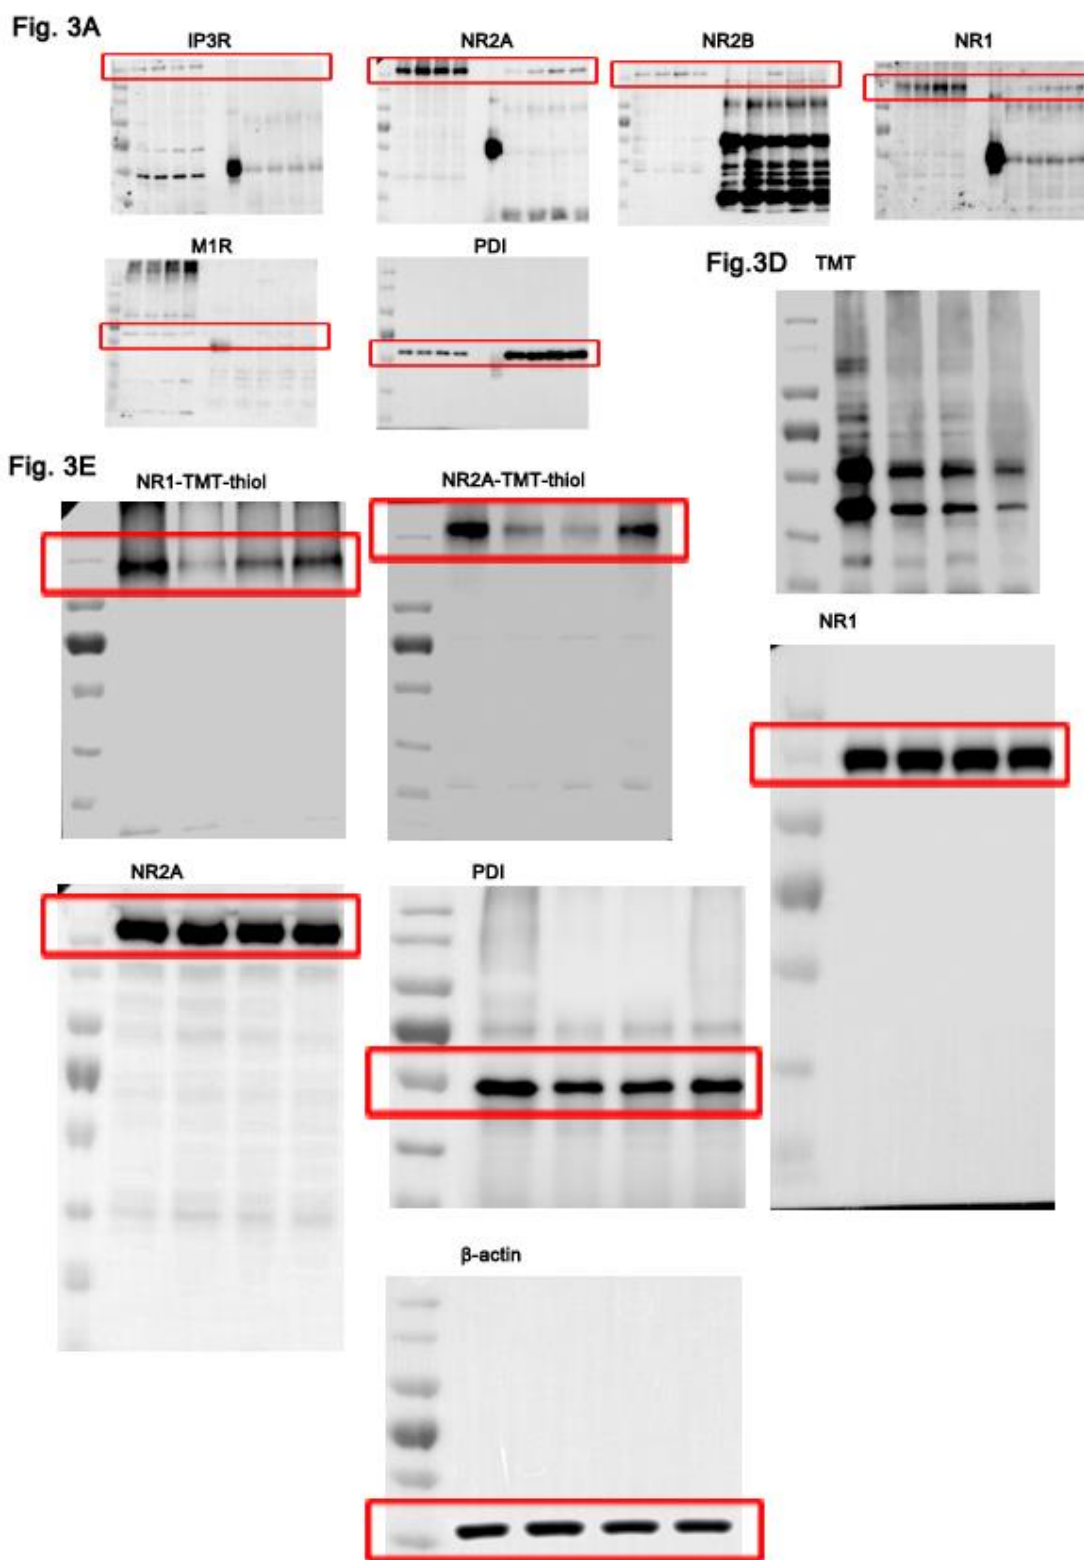

**Supplementary Figure 4.** Full-length gel images of western blot data in Figure 3. The cropped parts of western blots are indicated with boxes.

**Fig. 4D**

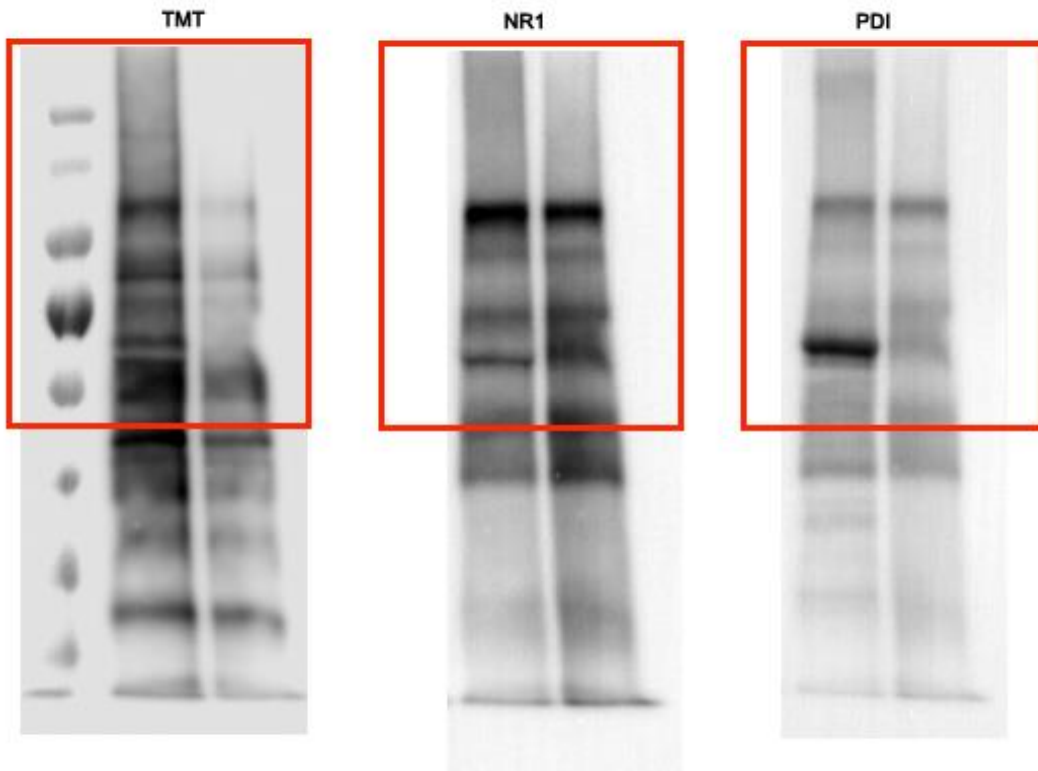

**Supplementary Figure 5.** Full-length gel images of western blot data in Figure 4. The cropped parts of western blots are indicated with boxes.

Fig. 5A

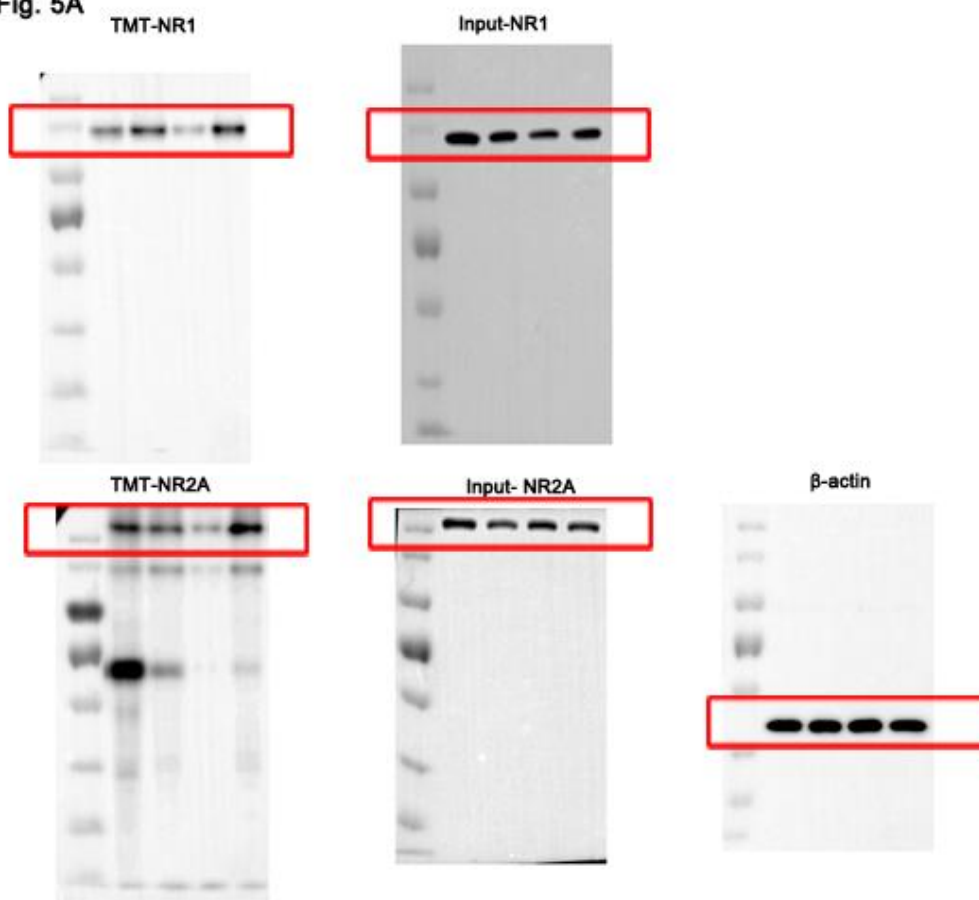

Fig. 5D

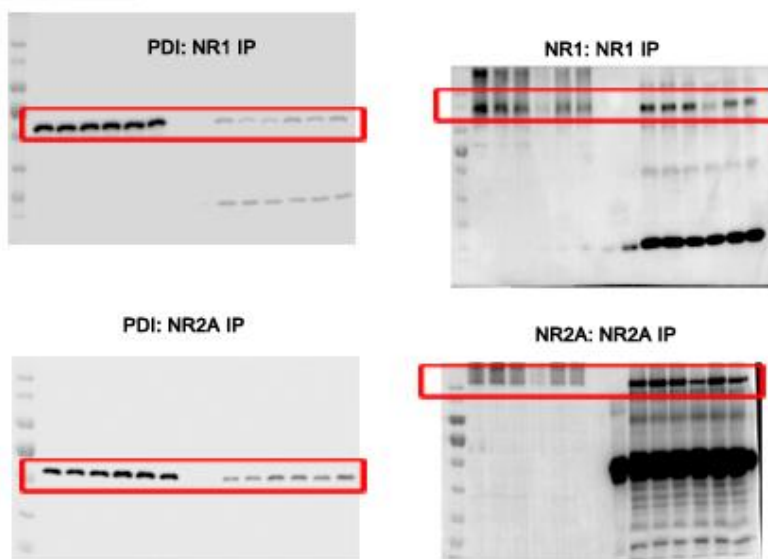

**Supplementary Figure 6.** Full-length gel images of western blot data in Figure 5. The cropped parts of western blots are indicated with boxes.

Fig. 6E

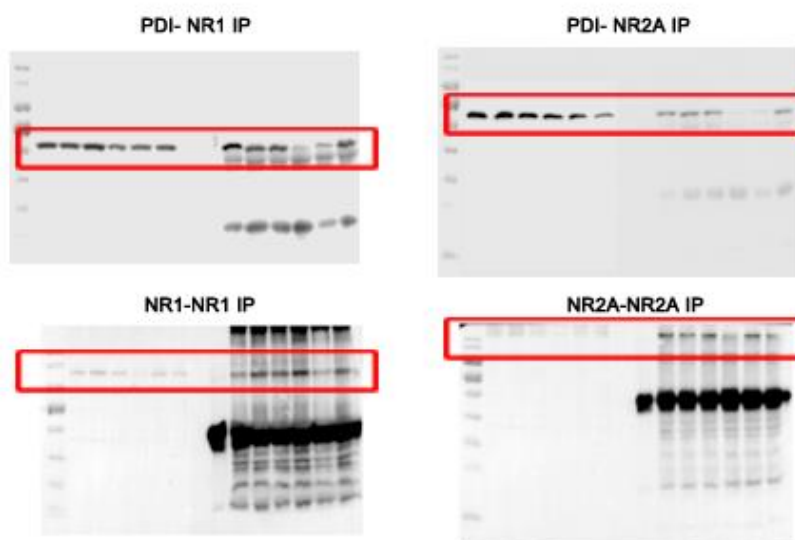

Fig. 6G

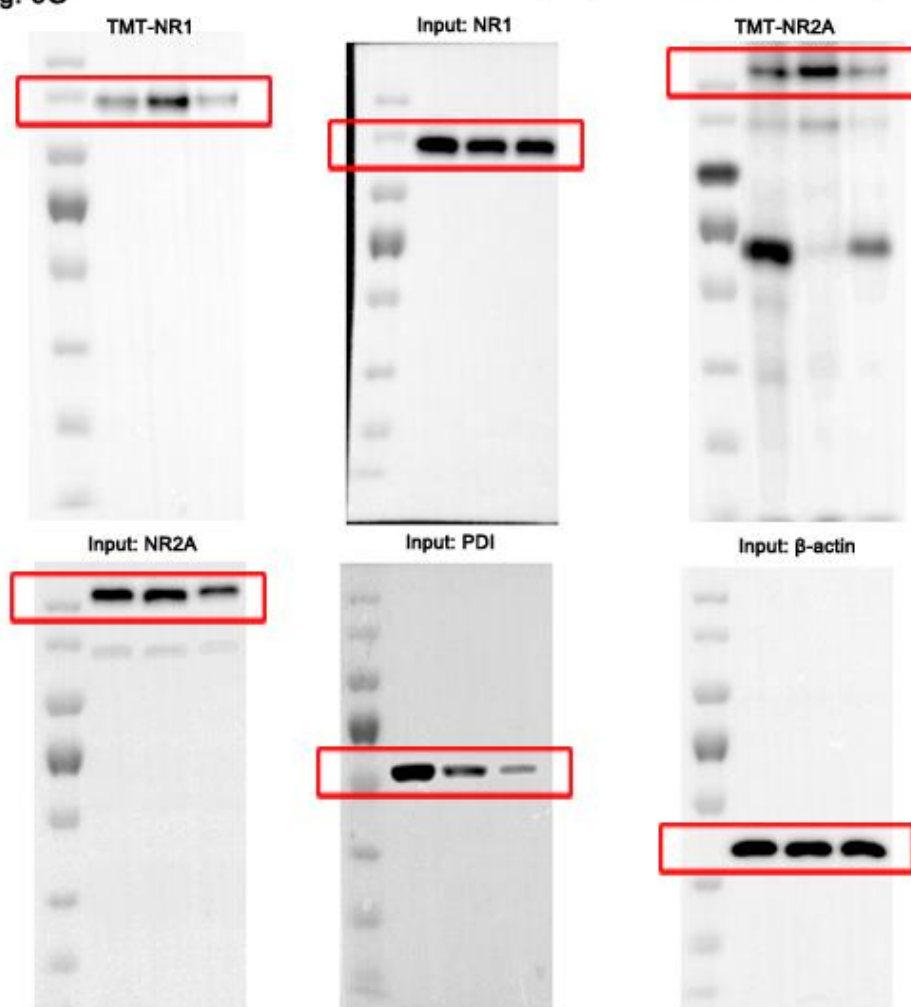

**Supplementary Figure 7.** Full-length gel images of western blot data in Figure 6. The cropped parts of western blots are indicated with boxes.



Fig. 7A

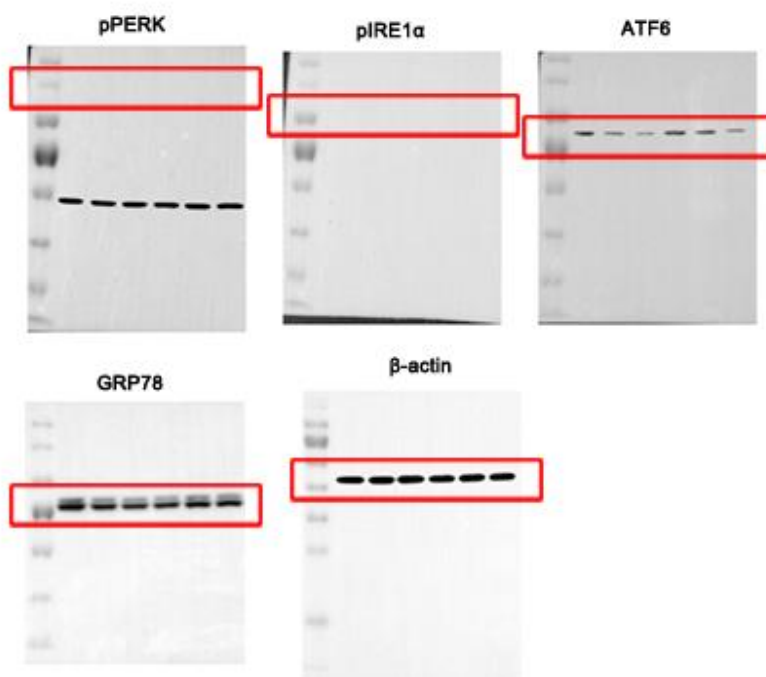

Fig. 7B

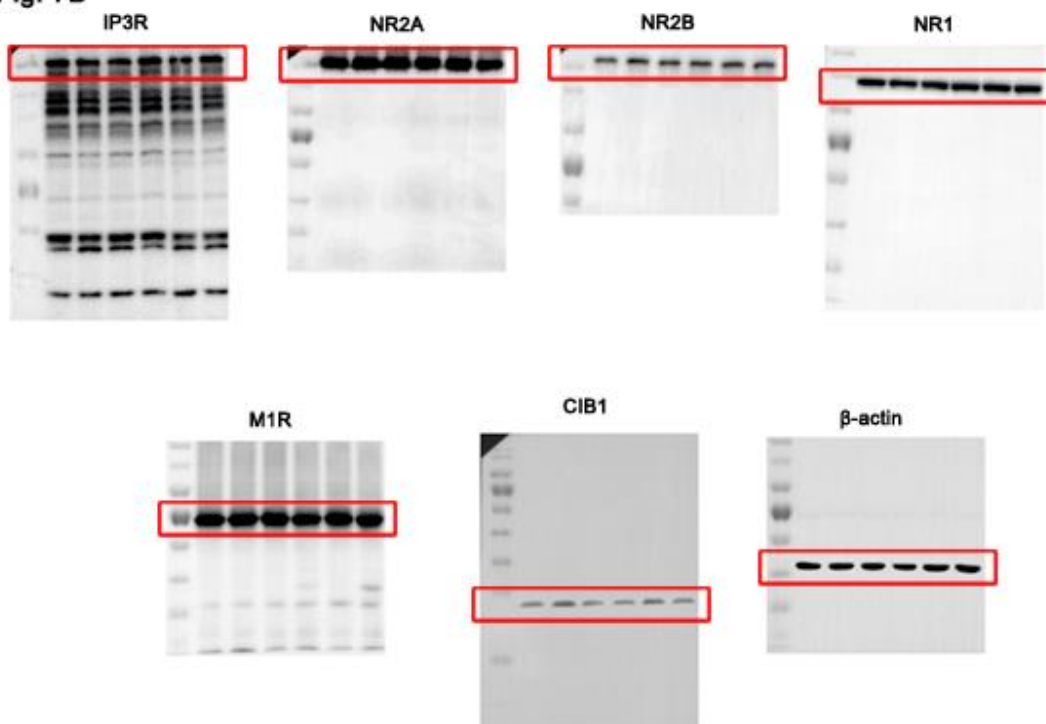

**Supplementary Figure 8.** Full-length gel images of western blot data in Figure 7. The cropped parts of western blots are indicated with boxes.

SFig. 1A

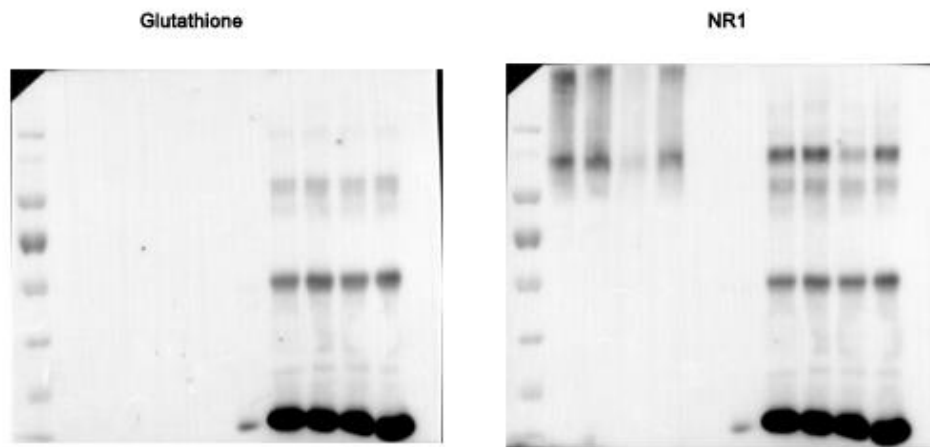

SFig. 1B

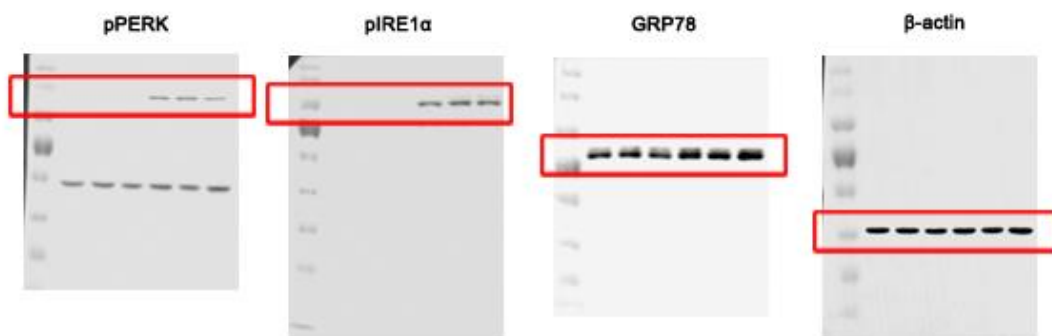

**Supplementary Figure 9.** Full-length gel images of western blot data in Supplementary figure 1. The cropped parts of western blots are indicated with boxes.
